# Supplementary material
Source: PubMed Central journal article supplement (PMC7484574)
Supplement: TBSD_A_1803968_SM4930.pdf [file TBSD_A_1803968_SM4930.pdf]

**In Silico Investigation of Phytoconstituents from Indian Medicinal Herb '*Tinospora cordifolia* (Giloy)' against SARS-CoV-2 (COVID-19) by Molecular Dynamics Approach**

Papia Chowdhury \*

Department of Physics and Materials Science and Engineering,  
Jaypee Institute of Information Technology, Noida 201309, Uttar Pradesh, India.

\*Corresponding author: [papia.chowdhury@jiit.ac.in](mailto:papia.chowdhury@jiit.ac.in)

**Keywords:** COVID-19, SARS-CoV-2, *Tinospora cordifolia*, berberine, 3CL<sup>pro</sup>,  $\beta$ -sitosterol

| <b>Protein: 3CL<sup>pro</sup> (PDBID: 6W63)</b>                                                                                                                                                            | <b>Protein: 3CL<sup>pro</sup> (PDBID: 6LU7)</b>                                                                                                                                  |
|------------------------------------------------------------------------------------------------------------------------------------------------------------------------------------------------------------|----------------------------------------------------------------------------------------------------------------------------------------------------------------------------------|
| Classification: <u>VIRAL PROTEIN/INHIBITOR</u> , main protease bound to potent broad-spectrum non-covalent inhibitor X77                                                                                   | Classification: <u>VIRAL PROTEIN</u> , main protease in complex with an inhibitor N3                                                                                             |
| <b>Organism(s):</b> Severe acute respiratory syndrome coronavirus 2                                                                                                                                        | <b>Organism(s):</b> Severe acute respiratory syndrome coronavirus 2, synthetic construct                                                                                         |
| <b>Molecule:</b> 3C-like proteinase, <b>Mutation(s):</b> 0                                                                                                                                                 | <b>Molecule:</b> main protease <b>Mutation(s):</b> 0                                                                                                                             |
| <b>Chains:</b> A <b>SequenceLength:</b> 306<br><b>Gene Names:</b> rep, 1a-1b                                                                                                                               | <b>Chains:</b> A <b>SequenceLength:</b> 306<br><b>GeneNames:</b> rep, 1a-1b                                                                                                      |
| X-RAY DIFFRACTION DATA<br><b>Resolution:</b> 2.10 Å<br><b>R-Value Free:</b> 0.221<br><b>R-Value Work:</b> 0.150<br><b>R-Value Observed:</b> 0.157<br><b>Space Group:</b> P 2 <sub>1</sub> 2 <sub>1</sub> 2 | X-RAY DIFFRACTION DATA<br><b>Resolution:</b> 2.16 Å<br><b>R-Value Free:</b> 0.235<br><b>R-Value Work:</b> 0.202<br><b>R-Value Observed:</b> 0.204<br><b>Space Group:</b> C 1 2 1 |
| <b>Length ( Å ) Angle ( ° )</b><br>a = 45.05    α = 90<br>b = 63.84    β = 90<br>c = 106.588    γ = 90                                                                                                     | <b>Length ( Å ) Angle ( ° )</b><br>a = 97.931    α = 90<br>b = 79.477    β = 114.55<br>c = 51.803    γ = 90                                                                      |
| <b>Macromolecule Content</b><br>Total Structure Weight: 34.29 kDa<br>Atom Count: 4995<br>Residue Count: 305<br>Unique protein chains: 1                                                                    | <b>Macromolecule Content</b><br>Total Structure Weight: 34.51 kDa<br>Atom Count: 2500<br>Residue Count: 312<br>Unique protein chains: 2                                          |
| 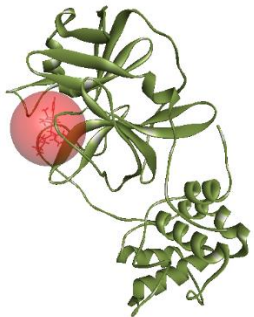                                                                                                                        |                                                                                              |
|                                                                                                                         |                                                                                              |
| Native ligand<br>C <sub>27</sub> H <sub>33</sub> N <sub>5</sub> O <sub>2</sub>                                                                                                                             | Native ligand<br>X77                                                                                                                                                             |

**Table SD1:** Configuration required of target proteins for simulation.

A

B

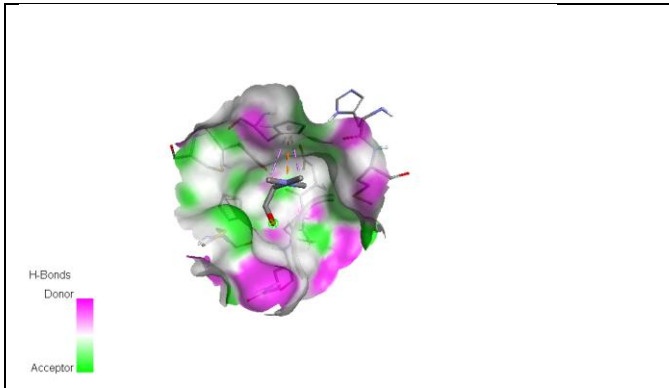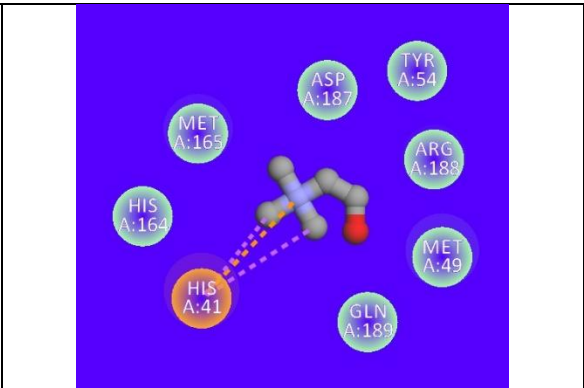

3D: Choline:6W63

2D: Choline: 6W63

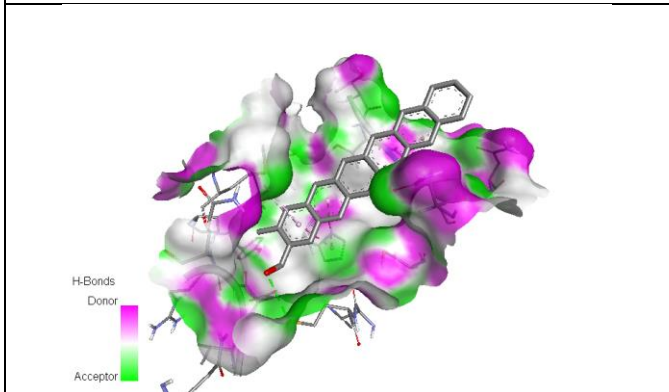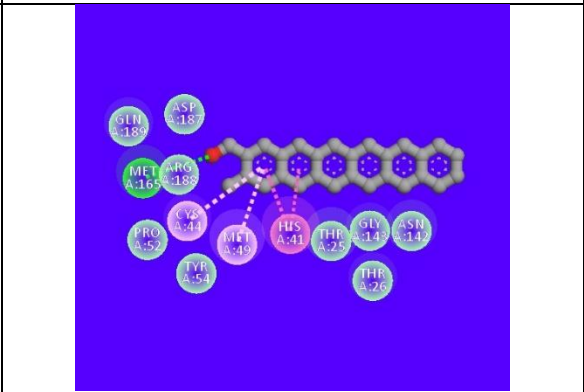

3D: octacosanol:6W63

2D: octacosanol: 6W63

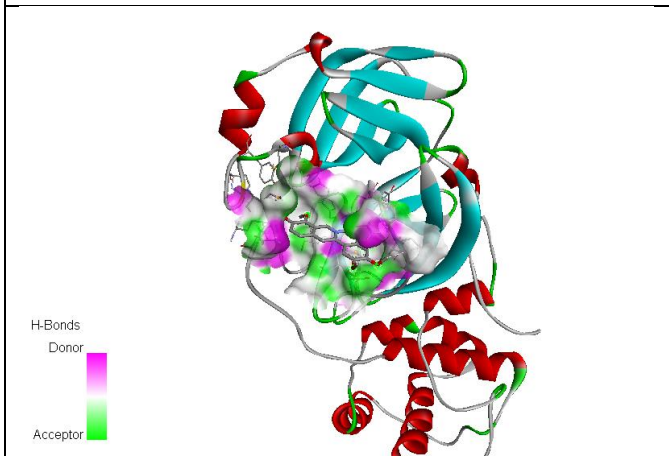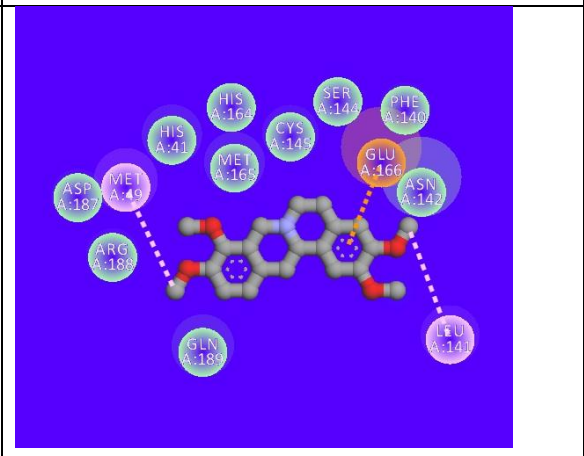

3D: tetrahydropalmitate:6W63

2D: tetrahydropalmitate: 6W63

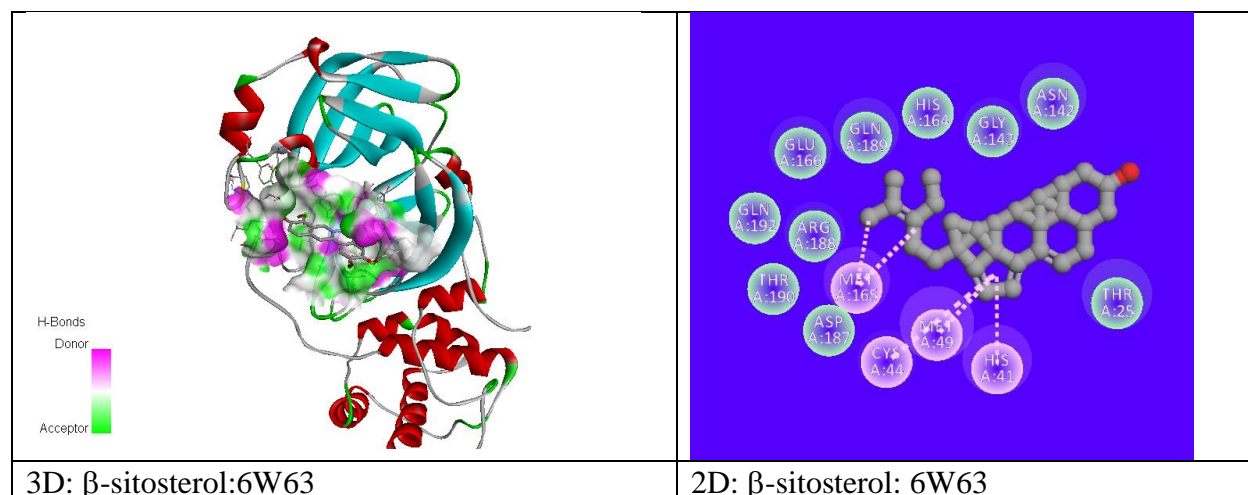

**Figure SD2.** Donor: acceptor surface and possible types of interactions in best pose structures obtained from molecular docking for different ligands with COVID-19 protease enzyme 3CL<sup>pro</sup> (6W63).

| Ligand              | Best Binding affinity (kcal/mole) | Hydrogen bonded interaction (protein donor: ligand acceptor, distance in Å) | Hydrophobic interaction (protein donor: ligand acceptor, distance in Å)                                                                                                                              | Dipole moment (debye) | Drying energy between protein and ligand | Inhibition constant (M) |
|---------------------|-----------------------------------|-----------------------------------------------------------------------------|------------------------------------------------------------------------------------------------------------------------------------------------------------------------------------------------------|-----------------------|------------------------------------------|-------------------------|
| Berberine           | -7.7                              | (A:THR24:HG1 - :UNK0:O, 2.9335)                                             | A:HIS41 - :UNK0, 3.86746<br>A:HIS41 - :UNK0, 3.85981<br>:UNK0 - A:CYS145, 5.40468                                                                                                                    | 1.677                 | 426.855                                  | $2.23 \times 10^{-6}$   |
| $\beta$ -sitosterol | -8.0                              |                                                                             | A:CYS44 - :UNK0, 5.02829<br>A:MET49 - :UNK0, 4.7919<br>A:MET165 - :UNK0, 4.24509<br>:UNK0:C - A:MET165, 4.39444<br>A:HIS41 - :UNK0, 4.30937                                                          | 1.473                 | 1,284.01                                 | $1.34 \times 10^{-6}$   |
| Choline             | -3.3                              |                                                                             | :UNK0:C - A:HIS41, 3.6805<br>:UNK0:C - A:HIS41, 3.91798                                                                                                                                              | 4.177                 | 103.961                                  | $3.79 \times 10^{-3}$   |
| Tetrahydropalmatine | -6.4                              | :UNK0:C - A:MET49:O, 3.53709                                                | A:HIS41 - :UNK0, 3.70768<br>A:THR24:C,O;THR25:N - :UNK0, 5.01159                                                                                                                                     | 2.669                 | 373.597                                  | $2.01 \times 10^{-5}$   |
| octacosanol         | -7.1                              | A:ASN119:HD21 - :UNK0:O, 2.1903                                             | A:THR25:CG2 - :UNK0, 3.80725<br>A:HIS41 - :UNK0, 4.09107<br>A:HIS41 - :UNK0, 4.46232<br>A:HIS41 - :UNK0, 5.27182<br>:UNK0 - A:CYS44, 5.37368<br>:UNK0 - A:MET49, 5.27559<br>:UNK0 - A:MET49, 5.22475 | 1.253                 | 414.219                                  | $6.16 \times 10^{-6}$   |

**Table SD3:** Interaction detail for different ligands: berberine,  $\beta$ -sitosterol, choline, tetrahydropalmatine and octacosanol with receptor protein II (6W63)

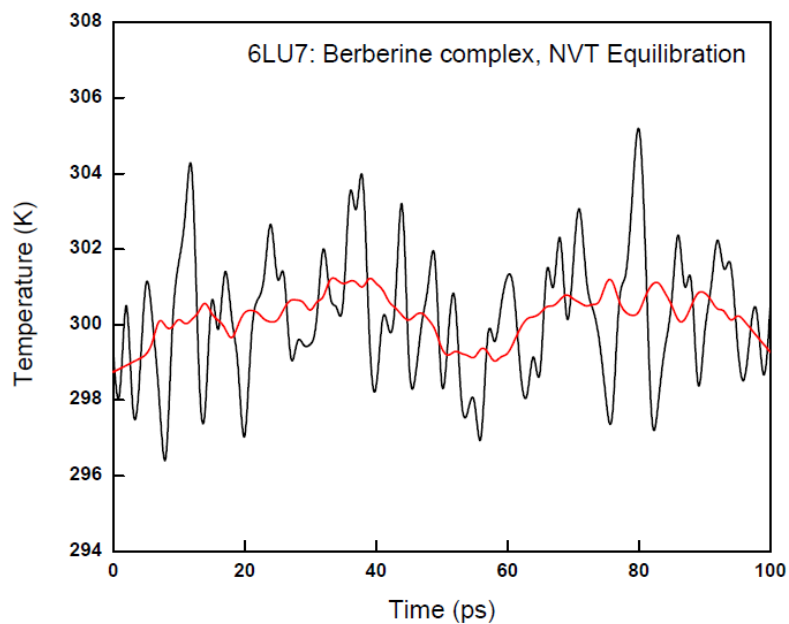

**Figure SD4:** Temperature progression data by MD simulation for 6LU7: berberine complex in water environment.

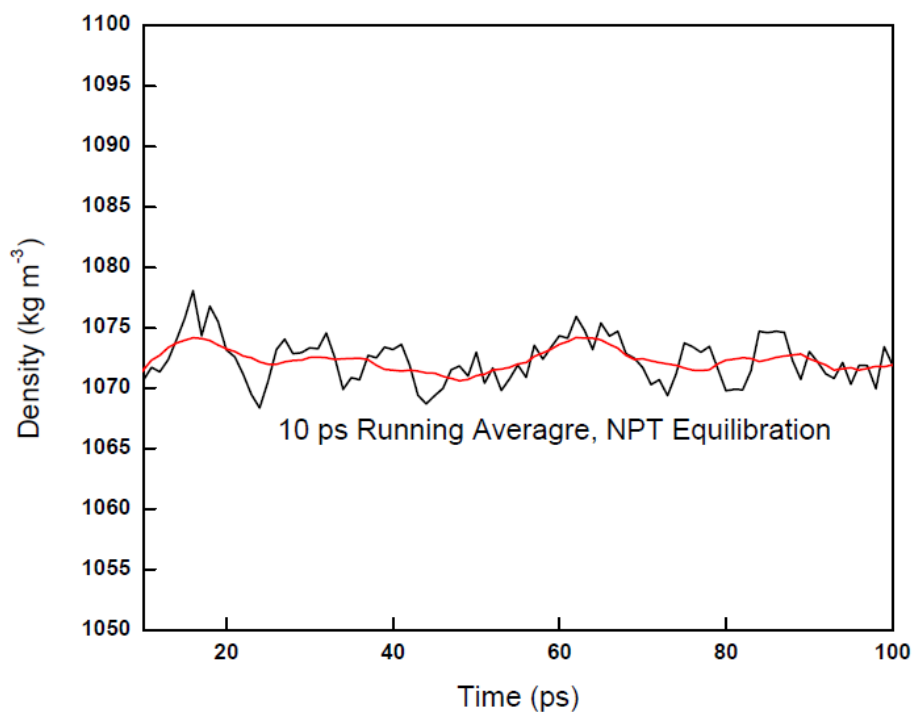

**Figure SD5:** Density progression data by MD simulation for 6LU7: berberine complex in water environment.

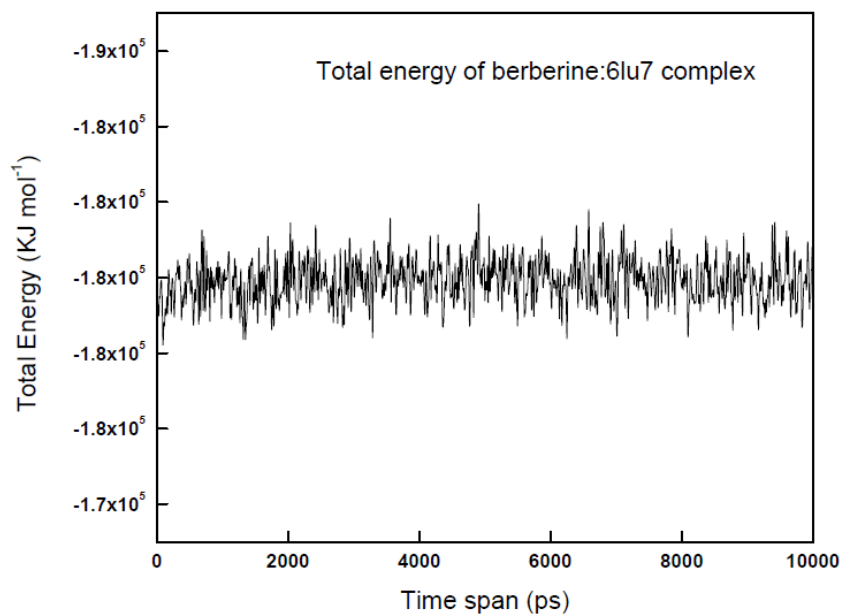

**Figure SD6:** Total energy by MD simulation for 6LU7: berberine complex in water environment.

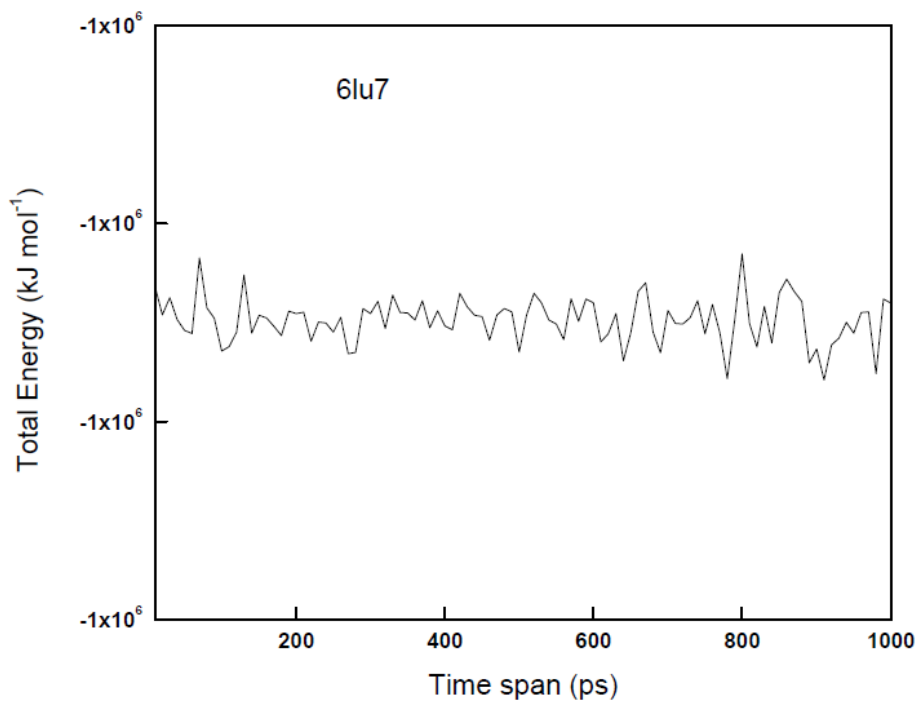

**Figure SD7:** Total energy by MD simulation for 6LU7 in water environment.

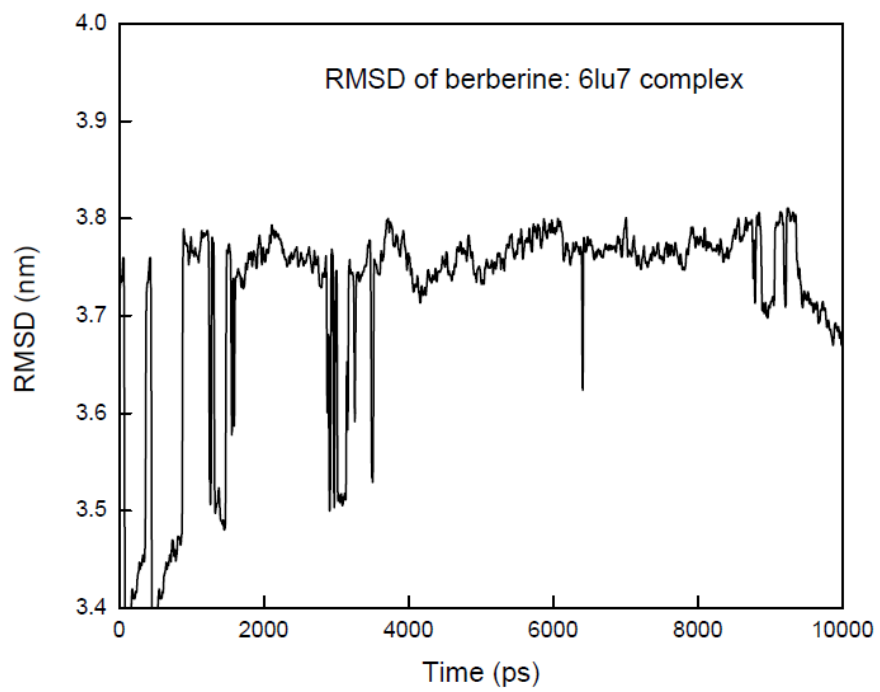

**Figure SD8:** RMSD of berberine: 6LU7 complex.
